# Supplementary material for: Time-dependent changes in the early salivary proteome after oral stimulation with wine differs by the individual 6- n -propylthiouracil (prop) taster status
Source: Royal Society of Chemistry journal article supplement (doi:10.1039/d4fo05082g), 2025-01-01
Supplement: d4fo05082g1.pdf [file d4fo05082g1.pdf]

## TIME-DEPENDENT CHANGES IN THE EARLY SALIVARY PROTEOME AFTER THE ORAL STIMULATION WITH WINE DEPEND ON INDIVIDUAL 6-n-PROPYLTHIOURACIL (PROP) TASTER STATUS

Rafael I. Velázquez-Martínez<sup>a</sup>, Carolina Muñoz-González<sup>a</sup>, Anabel Marina-Ramírez<sup>a</sup>, María Ángeles Pozo-Bayón<sup>\*a</sup>

### 6. Supplementary materials

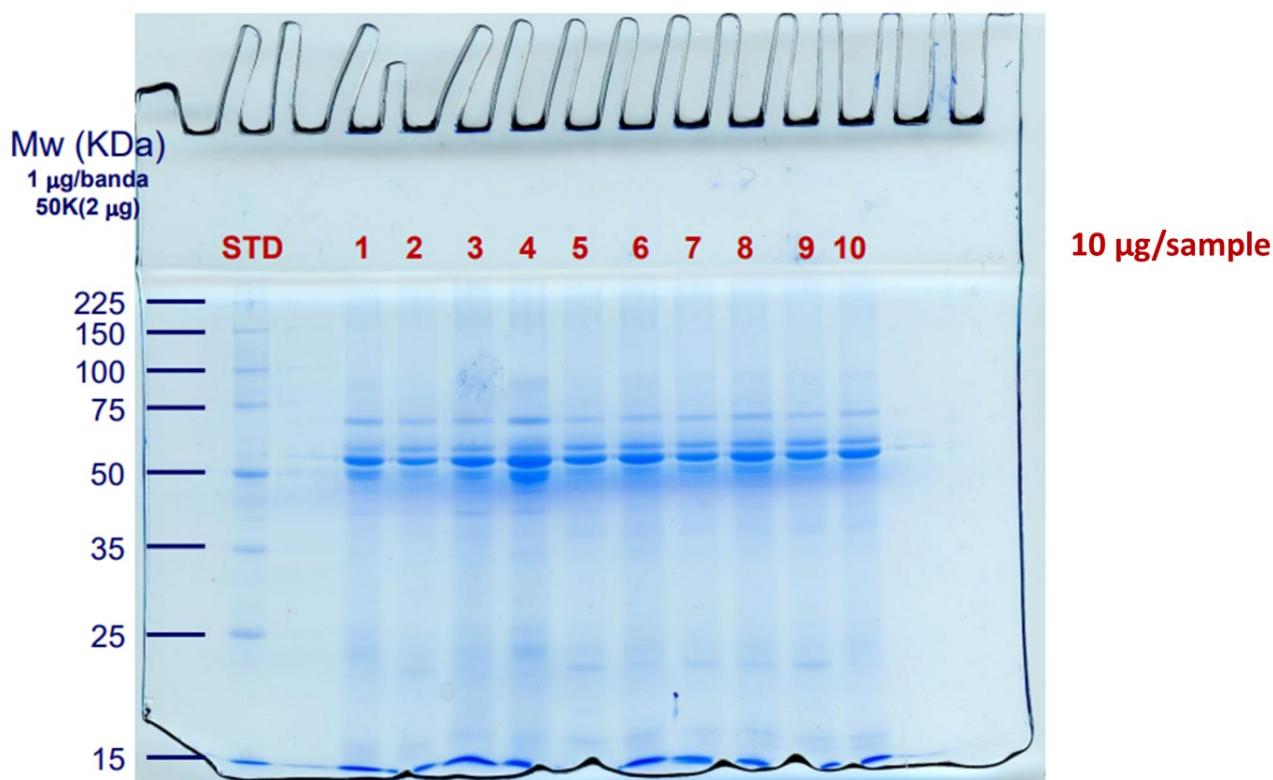

Figure 1S. One-dimensional SDS-PAGE profile of saliva samples. STD sample (standard sample) for quantification and verification of sample status and concentrator gels for sample digestion and desalting. Sample 1 is basal saliva from NT individuals. Samples 2 and 3 are saliva collected 30 and 60 s after oral exposure to CRW in NT individuals. Sample 4 is basal saliva from T individuals. Samples 5 and 6 are saliva collected 30 and 60 s after oral exposure to CRW in T individuals. Samples 7 and 8 are saliva collected 30 and 60 s after oral exposure to TRW in NT individuals. Samples 9 and 10 are saliva collected 30 and 60 s after oral exposure to TRW in T individuals.

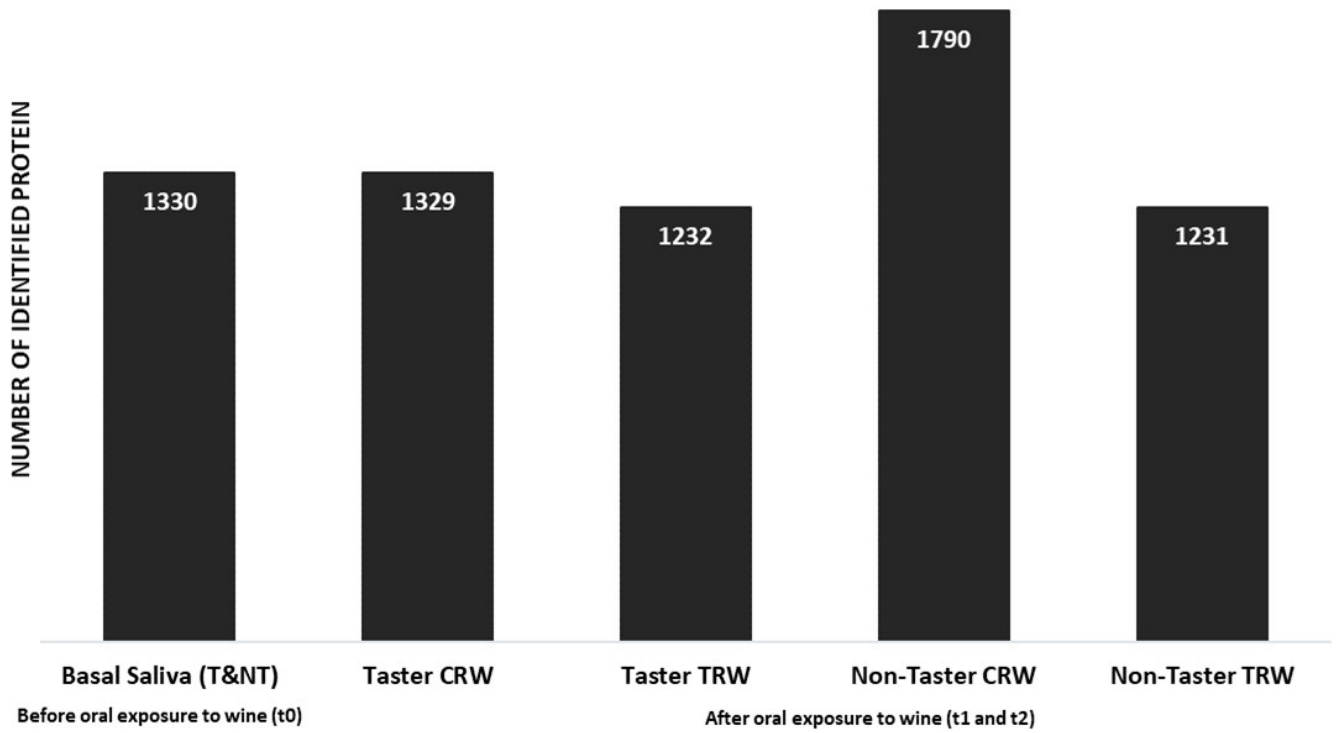

Figure 2S. Number of saliva proteins identified in the different saliva samples before and after the oral exposure to the wines (CRW and TRW). The number of proteins identified in the samples after the oral exposure to the wines include those identified in the first and second sampling point (30 and 60s). Identification done using the PEAKS Studio XPro search engine software (Bioinformatics Solutions Inc., Waterloo, Ontario, Canada) and uniprot-homo sapiens.fasta (80581 entries; UniProt release 12/2022) database.

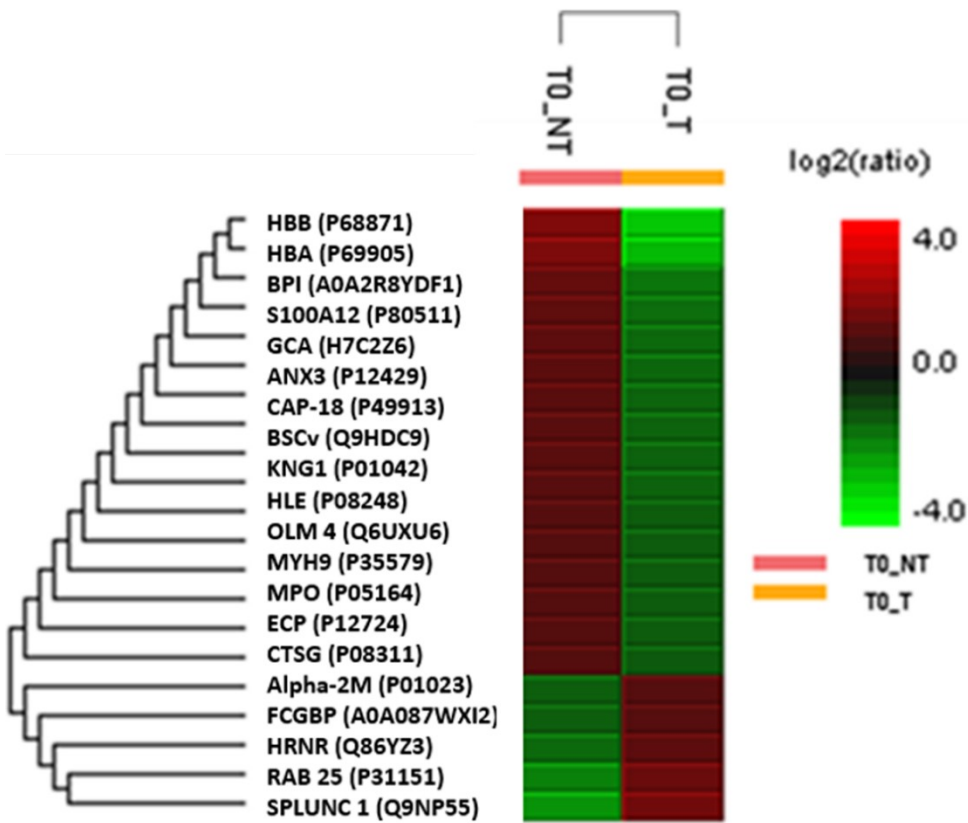

Figure 3S. Ranking of the abundance of statistically significant ( $p < 0.05$ ) proteins in the basal saliva of Non-Taster (left column) and Taster individuals. Each row is unique for a single protein, which is indicated at the beginning of each row and is identified by the Uniprot code. The red colour indicates in which saliva sample there is a higher abundance of each protein. Complete names of proteins can be check in table 1S.

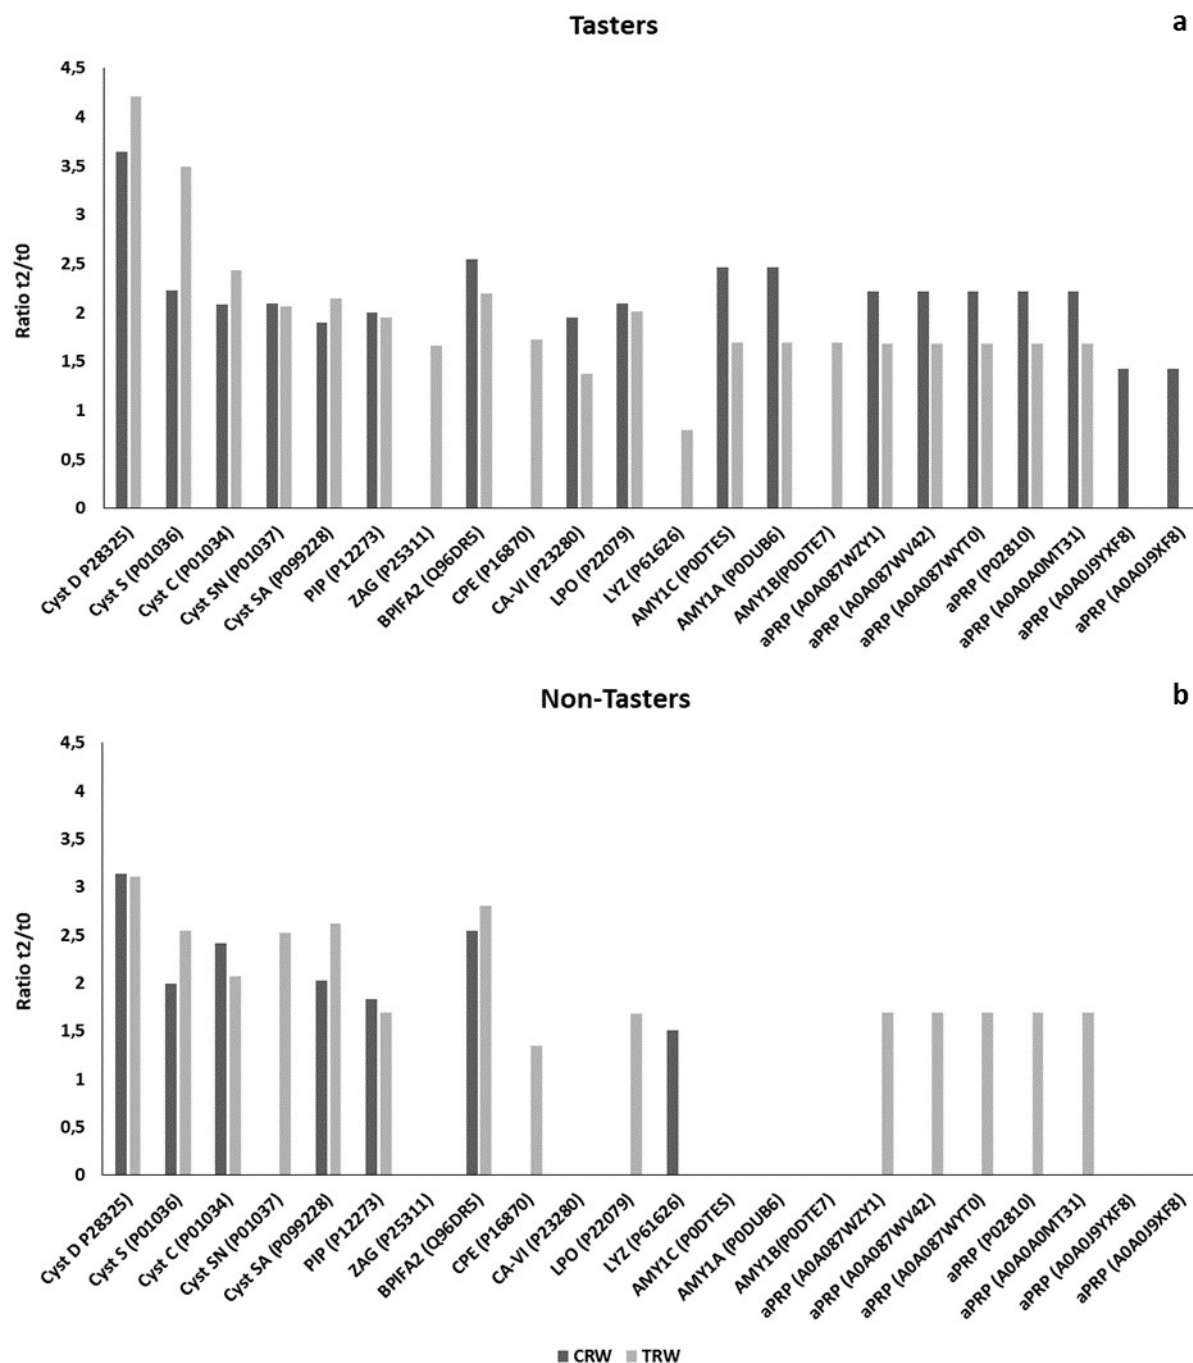

Figure 4S. Relative changes in the abundance of selected salivary proteins 60 seconds (t2/t0) after the oral exposure to CRW and TRW in saliva from a) Taster and b) Non-Taster individuals. Only significant changes ( $p < 0.01$ ) in the abundance compared to basal saliva are shown in the figure. The complete list of proteins is shown in Table 2S. Protein identifier is shown in brackets.

Name abbreviation: Cystatin D (Cyst D); cystatin S (Cyst S); cystatin C (Cyst C); cystatin SN (Cyst SN); cystatin SA (Cyst SA); protein-inducible protein (PIP); zin-alpha-2-glycoprotein (ZAC); BPI fold-containing family A member 2 (BPIFA2); carboxypeptidase E (CPE); carbonic anhydrase-VI (CA-VI); Lactoperoxidase (LPO); lysozyme C (LYZ); alpha amylase 1C (AMY1C); alpha amylase 1A (AMY1A); ); alpha amylase 1B (AMY1B); salivary acidic proline-rich phosphoprotein 1/2 (PRP H1); proline-rich protein 4 (PRP 4); proline-rich proteoglycan 2-like (aPRP).

Table 1S.- Significant differences ( $p < 0.05$ ) (significance  $> 13$  in the table) in the relative abundance of salivary proteins found in basal saliva ( $t_0$ ) between T and NT individuals (expressed as the ratio of protein abundance in T compared to NT at  $t_0$ ).

| Protein reference | Significance | Intensity Non-PROP | Intensity PROP | Ratio $t_0$ Taster/ $t_0$ Non-Taster | Coverage (%) | Peptides | Unique | Avg-Mass | Protein name                                 | Abbreviation |
|-------------------|--------------|--------------------|----------------|--------------------------------------|--------------|----------|--------|----------|----------------------------------------------|--------------|
| P68871            | 200          | 175,09             | 1,92E+07       | 0,11                                 | 53           | 16       | 7      | 15998    | Hemoglobin subunit beta                      | HBB          |
| P69905            | 200          | 9,57E+06           | 1,35E+06       | 0,14                                 | 46           | 7        | 7      | 15258    | Hemoglobin subunit alpha                     | HBA          |
| Q9NP55            | 68,56        | 8,10E+05           | 2,89E+06       | 3,56                                 | 27           | 5        | 5      | 26713    | BPI fold-containing family A member 1        | SPLUNC1      |
| P31151            | 45,06        | 1,51E+06           | 4,04E+06       | 2,68                                 | 35           | 4        | 4      | 11471    | Protein S100-A7                              | S100A7       |
| P80511            | 32,59        | 8,23E+06           | 4,11E+06       | 0,5                                  | 47           | 5        | 5      | 10575    | Protein S100-A12                             | S100A12      |
| P17213            | 31,32        | 6,13E+06           | 2,72E+06       | 0,44                                 | 19           | 11       | 11     | 53369    | Bactericidal permeability-increasing protein | BPI          |
| P08246            | 23,53        | 1,92E+07           | 1,10E+07       | 0,58                                 | 50           | 17       | 17     | 28518    | Neutrophil elastase                          | HLE          |
| P12429            | 23,3         | 1,09E+07           | 5,95E+06       | 0,55                                 | 51           | 22       | 20     | 36375    | Annexin A3                                   | ANX3         |
| H7C2Z6            | 21,03        | 4,39E+06           | 2,32E+06       | 0,53                                 | 31           | 5        | 5      | 22109    | Grancalcin                                   | GCA          |
| Q9HDC9            | 19,51        | 2,32E+06           | 1,31E+06       | 0,56                                 | 14           | 6        | 6      | 46480    | Adipocyte plasma membrane-associated protein | BSCv         |
| A04087WXI2        | 18,69        | 7,12E+06           | 1,18E+07       | 1,65                                 | 11           | 42       | 42     | 445213   | IgGFc-binding protein                        | FCGBP        |
| P49913            | 18,51        | 3,37E+06           | 1,88E+06       | 0,56                                 | 36           | 7        | 7      | 19301    | Cathelicidin antimicrobial peptide           | CAP-18       |
| P01023            | 18,18        | 1,46E+07           | 9,29E+06       | 0,63                                 | 26           | 37       | 37     | 163290   | Alpha-2-macroglobulin                        | Alpha-2-M    |
| P57735            | 17,62        | 3,28E+05           | 6,30E+05       | 1,92                                 | 17           | 5        | 4      | 23496    | Ras-related protein Rab-25                   | RAB25        |
| P01042            | 17,31        | 5,88E+05           | 3,36E+05       | 0,57                                 | 10           | 6        | 6      | 71957    | Kininogen-1                                  | KNG1         |
| P05164            | 16,46        | 1,11E+07           | 6,94E+06       | 0,62                                 | 36           | 36       | 30     | 83869    | Myeloperoxidase                              | MPO          |
| P08311            | 16,13        | 1,03E+07           | 6,46E+06       | 0,63                                 | 57           | 20       | 20     | 28837    | Cathepsin G                                  | CTSG         |
| Q86YZ3            | 15,26        | 2,31E+05           | 3,83E+05       | 1,66                                 | 4            | 10       | 10     | 282389   | Hornein                                      | HRNR         |
| P32279            | 14,31        | 3,28E+06           | 2,03E+06       | 0,62                                 | 12           | 29       | 23     | 226530   | Myosin-9                                     | y14A         |
| Q6UX06            | 13,18        | 1,65E+06           | 1,01E+06       | 0,61                                 | 8            | 4        | 4      | 57280    | Olfactomedin-4                               | OLM4         |

<sup>a</sup>Significance: Only protein groups with a significance above this threshold are listed. The significance score is calculated as the  $-10\log_{10}$  of the significance testing p-value. PEAKS provides ANOVA significance testing methods. A significance score threshold of 13 equals to a significance testing p value of 0.05.

Table 2S.- Statistically significant changes ( $p < 0.05$ ) (significance  $> 13$  in the table) in salivary protein abundance 30 (t1) and 60 (t2) seconds after the oral intervention with control wine (CRW) in T and NT individuals.

| PROP Phenotype | Protein Accession ID | Significance | Intensity t0 | Intensity t1 | Intensity t2 | Ratio t1 /t0 | Ratio t2 /t0 | Coverage (%) | Peptides | Unique | Avg. Mass | Protein name                              | Abbreviation |
|----------------|----------------------|--------------|--------------|--------------|--------------|--------------|--------------|--------------|----------|--------|-----------|-------------------------------------------|--------------|
|                | P28325               | 111,01       | 2,80E+07     | 1,17E+08     | 1,02E+08     | 4,2          | 3,65         | 73           | 22       | 20     | 16080     | Cystatin-D                                | Cyst D       |
|                | P01036               | 67,9         | 9,02E+05     | 3,33E+06     | 2,01E+06     | 3,69         | 2,23         | 51           | 59       | 17     | 16214     | Cystatin-S                                | Cyst S       |
|                | Q96DR5               | 65,35        | 2,72E+07     | 7,56E+07     | 6,94E+07     | 2,78         | 2,55         | 63           | 29       | 28     | 27011     | BPI fold-containing family A member 2     | BPIFA2       |
|                | P80303               | 59,45        | 3,92E+06     | 1,21E+07     | 8,32E+06     | 3,09         | 2,12         | 34           | 17       | 15     | 50223     | Nucleobindin-2                            | NUCB2        |
|                | Q9NP55               | 57,5         | 2,89E+06     | 8,08E+05     | 9,28E+05     | 0,28         | 0,32         | 27           | 5        | 5      | 26713     | BPI fold-containing family A member 1     | SPLUNC1      |
|                | P34096               | 49,67        | 6,53E+05     | 1,07E+06     | 2,41E+06     | 1,64         | 3,7          | 31           | 4        | 4      | 16840     | Ribonuclease 4                            | RNase 4      |
|                | P22079               | 37,28        | 1,01E+07     | 2,37E+07     | 2,12E+07     | 2,33         | 2,09         | 44           | 33       | 33     | 80288     | Lactoperoxidase                           | LPO          |
|                | P01034               | 35,15        | 2,72E+06     | 6,81E+06     | 5,65E+06     | 2,5          | 2,08         | 64           | 13       | 13     | 15799     | Cystatin-C                                | Cyst C       |
|                | A0A8I5KU76           | 34,21        | 2,46E+05     | 2,80E+05     | 8,05E+05     | 1,14         | 3,27         | 11           | 4        | 4      | 39916     | Endoplasmic reticulum resident protein 44 | ERP44        |
|                | P31151               | 33,53        | 4,04E+06     | 2,94E+06     | 1,55E+06     | 0,73         | 0,38         | 35           | 4        | 4      | 11471     | Protein S100-A7                           | S100A7       |
|                | P0DTE8               | 32,32        | 2,10E+06     | 4,85E+06     | 5,16E+06     | 2,31         | 2,46         | 20           | 249      | 34     | 57768     | Alpha-amylase 1C                          | AMY1C        |
| <b>Taster</b>  | P0DUB6               | 32,32        | 2,10E+06     | 4,85E+06     | 5,16E+06     | 2,31         | 2,46         | 20           | 249      | 34     | 57768     | Alpha-amylase 1A                          | AMY1A        |

|                |       |              |              |              |      |      |    |    |    |       |                                                 |         |  |  |  |
|----------------|-------|--------------|--------------|--------------|------|------|----|----|----|-------|-------------------------------------------------|---------|--|--|--|
|                |       |              | 6            | 6            | 6    |      |    |    |    |       |                                                 |         |  |  |  |
| P12273         | 30,3  | 9,90E+0<br>6 | 2,07E+0<br>7 | 1,98E+0<br>7 | 2,09 | 2    | 77 | 34 | 34 | 16572 | Prolactin-inducible protein                     | PIP     |  |  |  |
| P81605         | 30,24 | 2,78E+0<br>6 | 4,51E+0<br>6 | 6,91E+0<br>6 | 1,62 | 2,49 | 38 | 5  | 5  | 11284 | Dermcidin                                       | DCD-1   |  |  |  |
| A0A087WZY<br>1 | 27,79 | 5,88E+0<br>5 | 1,06E+0<br>6 | 7,75E+0<br>5 | 2,23 | 2,22 | 32 | 16 | 16 | 27911 | Proline-rich proteoglycan 2-like                | aPRP    |  |  |  |
| A0A087WV4<br>2 | 27,79 | 5,88E+0<br>5 | 1,06E+0<br>6 | 7,75E+0<br>5 | 2,23 | 2,22 | 45 | 16 | 16 | 19134 | Salivary acidic proline-rich phosphoprotein 1/2 | PRP H1  |  |  |  |
| A0A087WYT<br>0 | 27,79 | 5,88E+0<br>5 | 1,06E+0<br>6 | 7,75E+0<br>5 | 2,23 | 2,22 | 48 | 16 | 16 | 17851 | Salivary acidic proline-rich phosphoprotein 1/2 | PRP H1  |  |  |  |
| P02810         | 27,79 | 5,88E+0<br>5 | 1,06E+0<br>6 | 7,75E+0<br>5 | 2,23 | 2,22 | 51 | 16 | 16 | 17016 | Salivary acidic proline-rich phosphoprotein 1/2 | aPRP-1  |  |  |  |
| A0A0A0MT3<br>1 | 27,79 | 5,88E+0<br>5 | 1,06E+0<br>6 | 7,75E+0<br>5 | 2,23 | 2,22 | 51 | 16 | 16 | 17015 | Proline-rich protein 4                          |         |  |  |  |
| P09228         | 26,67 | 5,17E+0<br>5 | 1,20E+0<br>6 | 9,80E+0<br>5 | 2,31 | 1,9  | 48 | 39 | 14 | 16445 | Cystatin-SA                                     | Cyst SA |  |  |  |
| P23280         | 26,62 | 8,19E+0<br>6 | 1,59E+0<br>7 | 1,60E+0<br>7 | 1,95 | 1,95 | 70 | 38 | 38 | 35367 | Carbonic anhydrase 6                            | CA-VI   |  |  |  |
| Q6E0U4         | 25,45 | 4,16E+0<br>5 | 6,08E+0<br>5 | 8,19E+0<br>5 | 1,46 | 1,97 | 9  | 4  | 4  | 47082 | Dermokine                                       | DMKN    |  |  |  |
| P01037         | 24,29 | 3,12E+0<br>6 | 7,06E+0<br>6 | 6,53E+0<br>6 | 2,26 | 2,09 | 56 | 61 | 27 | 16388 | Cystatin-SN                                     | Cyst SN |  |  |  |
| Q08554         | 22,33 | 1,00E+0<br>7 | 5,18E+0<br>6 | 1,09E+0<br>7 | 1,18 | 1,96 | 8  | 6  | 6  | 99987 | Desmocollin-1                                   | DSC1    |  |  |  |
| P15924         | 21,8  | 1,85E+0<br>7 | 1,83E+0<br>7 | 2,95E+0<br>7 | 0,99 | 1,6  | 27 | 89 | 88 | 33174 | Desmoplakin                                     | DP      |  |  |  |
| P57735         | 21,46 | 6,30E+0<br>5 | 3,61E+0<br>5 | 2,73E+0<br>5 | 0,57 | 0,43 | 17 | 5  | 4  | 23496 | Ras-related protein Rab-25                      | RAB25   |  |  |  |

|            |       |              |              |              |      |      |    |    |    |            |                                       |            |
|------------|-------|--------------|--------------|--------------|------|------|----|----|----|------------|---------------------------------------|------------|
| P69905     | 19,98 | 1,35E+0<br>6 | 6,92E+0<br>5 | 6,76E+0<br>5 | 0,51 | 0,5  | 46 | 7  | 7  | 15282      | Hemoglobin subunit alpha              | HBA        |
| P20930     | 19,96 | 1,75E+0<br>6 | 2,00E+0<br>6 | 3,27E+0<br>6 | 1,15 | 1,87 | 2  | 15 | 15 | 43518<br>0 | Filaggrin                             | FLG        |
| P02788     | 17,89 | 1,57E+0<br>7 | 1,45E+0<br>7 | 9,35E+0<br>6 | 0,92 | 0,59 | 73 | 72 | 69 | 78182      | Lactotransferrin                      | LTF        |
| Q8N474     | 16,76 | 5,56E+0<br>5 | 1,02E+0<br>6 | 7,39E+0<br>5 | 1,84 | 1,33 | 10 | 3  | 3  | 35386      | Secreted frizzled-related protein 1   | FRP-1      |
| Q96P63     | 16,65 | 1,76E+0<br>5 | 2,41E+0<br>5 | 3,54E+0<br>5 | 1,37 | 2,01 | 9  | 4  | 4  | 46276      | Serpin B12                            | Serpin B12 |
| Q08380     | 16,3  | 3,83E+0<br>6 | 6,54E+0<br>6 | 5,21E+0<br>6 | 1,71 | 1,36 | 25 | 16 | 16 | 65331      | Galectin-3-binding protein            | M2BP       |
| A0A0J9YXF8 | 16,3  | 2,31E+0<br>5 | 4,57E+0<br>5 | 3,30E+0<br>5 | 1,98 | 1,43 | 23 | 4  | 4  | 15097      | Proline-rich protein 4                | PRR4       |
| A0A0J9YXF8 | 16,3  | 2,31E+0<br>5 | 4,57E+0<br>5 | 3,30E+0<br>5 | 1,98 | 1,43 | 21 | 4  | 4  | 16890      | Proline-rich protein 4                | PRR4       |
| Q13217     | 16,08 | 5,03E+0<br>5 | 9,10E+0<br>5 | 7,50E+0<br>5 | 1,81 | 1,49 | 7  | 4  | 4  | 57580      | DnaJ homolog subfamily C member 3     | DNAJC3     |
| Q02413     | 15,95 | 6,14E+0<br>6 | 5,98E+0<br>6 | 8,95E+0<br>6 | 0,97 | 1,46 | 16 | 15 | 15 | 11374<br>8 | Desmoglein-1                          | DGI        |
| Q8TDL5     | 15,89 | 2,72E+0<br>7 | 2,07E+0<br>7 | 3,11E+0<br>7 | 0,76 | 1,14 | 68 | 33 | 33 | 52442      | BPI fold-containing family B member 1 | SPLUNC1    |
| Q86YZ3     | 15,04 | 3,83E+0<br>5 | 4,36E+0<br>5 | 7,28E+0<br>5 | 1,14 | 1,9  | 4  | 10 | 10 | 28238<br>9 | Hornerin                              | HRNR       |
| P02647     | 14,65 | 6,17E+0<br>6 | 3,76E+0<br>6 | 3,66E+0<br>6 | 0,61 | 0,59 | 50 | 13 | 13 | 30778      | Apolipoprotein A-I                    | Apo-AI     |
| P08493     | 14,54 | 3,59E+0<br>4 | 1,29E+0<br>5 | 8,37E+0<br>4 | 3,6  | 2,33 | 32 | 4  | 4  | 12353      | Matrix Gla protein                    | MGP        |
| P05141     | 14    | 1,46E+0<br>6 | 8,58E+0<br>5 | 8,69E+0<br>5 | 0,59 | 0,59 | 11 | 12 | 3  | 32852      | ADP/ATP translocase                   | ANT 2      |



|                   |            |       |              |              |              |      |      |    |    |    |            |                                               |          |
|-------------------|------------|-------|--------------|--------------|--------------|------|------|----|----|----|------------|-----------------------------------------------|----------|
|                   | P60174     | 13,64 | 7,76E+0<br>6 | 4,85E+0<br>6 | 4,95E+0<br>6 | 0,63 | 0,63 | 59 | 13 | 13 | 26669      | Triosephosphate isomerase                     | TIM      |
|                   | P68871     | 13,11 | 2,08E+0<br>6 | 1,24E+0<br>6 | 1,21E+0<br>6 | 0,59 | 0,58 | 53 | 16 | 7  | 15998      | Hemoglobin subunit beta                       | HBB      |
|                   | J3KNE3     | 13,07 | 2,16E+0<br>5 | 4,47E+0<br>5 | 1,97E+0<br>5 | 2,07 | 0,91 | 10 | 2  | 2  | 18357      | Platelet-activating factor acetylhydrolase IB | PAFAH1B2 |
|                   | P68871     | 200   | 1,92E+0<br>7 | 3,41E+0<br>6 | 1,53E+0<br>6 | 0,18 | 0,08 | 53 | 16 | 7  | 15998      | Hemoglobin subunit beta                       | HBB      |
|                   | P69905     | 200   | 9,57E+0<br>6 | 2,19E+0<br>6 | 8,80E+0<br>5 | 0,23 | 0,09 | 46 | 7  | 7  | 15258      | Hemoglobin subunit alpha                      | HBA      |
|                   | P28325     | 90,69 | 3,31E+0<br>7 | 1,04E+0<br>8 | 9,44E+0<br>7 | 3,14 | 2,85 | 73 | 22 | 20 | 16080      | Cystatin-D                                    | Cyst D   |
|                   | Q96DR5     | 63,2  | 3,20E+0<br>7 | 8,12E+0<br>7 | 7,24E+0<br>7 | 2,54 | 2,26 | 63 | 29 | 28 | 27011      | BPI fold-containing family A member 2         | BPIFA2   |
|                   | Q6E0U4     | 40,41 | 3,39E+0<br>5 | 4,88E+0<br>5 | 8,02E+0<br>5 | 1,44 | 2,37 | 9  | 4  | 4  | 47082      | Dermokine                                     | DMKN     |
|                   | P80303     | 32,75 | 3,76E+0<br>6 | 8,72E+0<br>6 | 6,93E+0<br>6 | 2,32 | 1,84 | 34 | 17 | 15 | 50223      | Nucleobindin-2                                | NEFA     |
|                   | P01034     | 32,39 | 2,39E+0<br>6 | 5,77E+0<br>6 | 4,64E+0<br>6 | 2,41 | 1,94 | 64 | 13 | 13 | 15799      | Cystatin-C                                    | Cyst C   |
|                   | P01036     | 31,64 | 9,61E+0<br>5 | 1,91E+0<br>6 | 2,02E+0<br>6 | 1,99 | 2,11 | 51 | 59 | 17 | 16214      | Cystatin-S                                    | Cyst S   |
|                   | A0A590UJZ9 | 24,9  | 7,06E+0<br>6 | 3,84E+0<br>6 | 4,11E+0<br>6 | 0,54 | 0,58 | 10 | 10 | 10 | 16657<br>7 | Deleted in malignant brain tumors 1 protein   | Hensin   |
|                   | P16403     | 24,51 | 3,18E+0<br>5 | 7,73E+0<br>5 | 4,06E+0<br>5 | 2,43 | 1,28 | 8  | 9  | 3  | 21365      | Histone H1.2                                  | H1-2     |
|                   | P09228     | 22,77 | 5,27E+0<br>5 | 1,06E+0<br>6 | 1,00E+0<br>6 | 2,02 | 1,91 | 48 | 39 | 14 | 16445      | Cystatin-SA                                   | Cyst SA  |
| <b>Non-Taster</b> | P12273     | 21,04 | 9,23E+0<br>6 | 1,69E+0<br>7 | 1,53E+0<br>7 | 1,83 | 1,65 | 77 | 34 | 34 | 16572      | Prolactin-inducible protein                   | PIP      |

|        |       |          |          |          |      |      |    |    |    |        |                                                 |         |
|--------|-------|----------|----------|----------|------|------|----|----|----|--------|-------------------------------------------------|---------|
| P61626 | 20,43 | 2,05E+07 | 3,10E+07 | 1,91E+07 | 1,51 | 0,93 | 69 | 30 | 30 | 16537  | Lysozyme C                                      | LYZ     |
| P01037 | 19,41 | 3,02E+06 | 4,57E+06 | 5,40E+06 | 1,51 | 1,79 | 56 | 61 | 27 | 16388  | Cystatin-SN                                     | Cyst SN |
| P22079 | 17,9  | 1,13E+07 | 1,79E+07 | 1,79E+07 | 1,59 | 1,59 | 44 | 33 | 33 | 80288  | Lactoperoxidase                                 | LPO     |
| Q86YZ3 | 15,55 | 2,31E+05 | 3,39E+05 | 2,07E+05 | 1,47 | 0,9  | 4  | 10 | 10 | 282389 | Hornein                                         | HRNR    |
| P61088 | 13,86 | 3,71E+05 | 3,48E+05 | 6,82E+05 | 0,94 | 1,84 | 12 | 2  | 2  | 17377  | Putative ubiquitin-conjugating enzyme E2 N-like | Ubc13   |
| P49411 | 13,02 | 3,86E+06 | 2,21E+06 | 3,07E+06 | 0,57 | 0,8  | 13 | 7  | 7  | 49542  | Elongation factor Tu mitochondrial              | EF-Tu   |

<sup>a</sup>Significance: Only protein groups with a significance above this threshold are listed. The significance score is calculated as the  $-10\log_{10}$  of the significance testing p-value. PEAKS provides ANOVA significance testing methods. A significance score threshold of 13 equals to a significance testing p value of 0.05.

Table 3S. Statistically significant changes ( $p < 0.05$ ) (significance  $> 13$  in the table) in salivary protein abundance 30 (t1) and 60 (t2) seconds after the oral intervention with the tannin spiked red wine (CRW) in T and NT individuals

| PROP Phenotype | Accession | Significance | Intensity t0 | Intensity t1 | Intensity t2 | Ratio t1/t0 | Ratio t2/t0 | Coverage (%) | Peptides | Unique | Avg. Mass | Protein Name                          | Abbreviation |
|----------------|-----------|--------------|--------------|--------------|--------------|-------------|-------------|--------------|----------|--------|-----------|---------------------------------------|--------------|
| Taster         | P28325    | 200          | 1,19E+07     | 8,00E+07     | 4,99E+07     | 6,75        | 4,21        | 73           | 22       | 20     | 16080     | Cystatin-D                            | Cyst D       |
|                | Q96DR5    | 95,44        | 2,10E+07     | 6,80E+07     | 4,62E+07     | 3,24        | 2,2         | 63           | 29       | 28     | 27011     | BPI fold-containing family A member 2 | BPIFA2       |
|                | Q6E0U4    | 91,04        | 4,68E+05     | 1,75E+06     | 7,19E+05     | 3,74        | 1,54        | 9            | 4        | 4      | 47082     | Dermokine                             | DMKN         |
|                | P80303    | 89,17        | 2,25E+06     | 9,03E+06     | 4,88E+06     | 4           | 2,17        | 34           | 17       | 15     | 50223     | Nucleobindin-2                        | NEFA         |
|                | P01036    | 87,35        | 1,01E+06     | 4,42E+06     | 3,52E+06     | 4,38        | 3,49        | 51           | 59       | 17     | 16214     | Cystatin-S                            | Cyst S       |
|                | P01034    | 78,22        | 3,77E+06     | 1,41E+07     | 9,18E+06     | 3,73        | 2,43        | 64           | 13       | 13     | 15799     | Cystatin-C                            | Cyst C       |
|                | P09228    | 59,79        | 1,08E+06     | 3,64E+06     | 2,33E+06     | 3,36        | 2,15        | 48           | 39       | 14     | 16445     | Cystatin-SA                           | Cyst SA      |
|                | P01037    | 55,62        | 1,68E+06     | 5,85E+06     | 3,47E+06     | 3,48        | 2,06        | 56           | 61       | 27     | 16388     | Cystatin-SN                           | Cyst SN      |

|            |       |          |          |          |      |      |    |     |    |        |                                   |           |
|------------|-------|----------|----------|----------|------|------|----|-----|----|--------|-----------------------------------|-----------|
| P12273     | 53,51 | 1,14E+07 | 2,98E+07 | 2,23E+07 | 2,61 | 1,95 | 77 | 34  | 34 | 16572  | Prolactin-inducible protein       | PIP       |
| P22079     | 44,6  | 7,74E+06 | 2,05E+07 | 1,56E+07 | 2,64 | 2,01 | 44 | 33  | 33 | 80288  | Lactoperoxidase                   | LPO       |
| P69905     | 42,84 | 2,65E+06 | 7,15E+06 | 2,91E+06 | 2,7  | 1,1  | 46 | 7   | 7  | 15258  | Hemoglobin subunit alpha          | HBA       |
| P52565     | 40,27 | 1,11E+06 | 5,43E+05 | 4,37E+05 | 0,49 | 0,39 | 22 | 5   | 5  | 23207  | Rho GDP-dissociation inhibitor 1  | Rho GDI 1 |
| Q02818     | 38,29 | 2,03E+05 | 5,70E+05 | 3,28E+05 | 2,81 | 1,62 | 10 | 7   | 5  | 53879  | Nucleobindin-1                    | NUCB1     |
| P20930     | 35,55 | 9,67E+05 | 3,22E+06 | 1,31E+06 | 3,34 | 1,36 | 2  | 15  | 15 | 435180 | Filaggrin                         | FLG       |
| P0DTE8     | 34,37 | 2,53E+06 | 6,04E+06 | 4,27E+06 | 2,39 | 1,69 | 20 | 248 | 34 | 57768  | Alpha-amylase 1C                  | AMY1C     |
| P0DUB6     | 34,37 | 2,53E+06 | 6,04E+06 | 4,27E+06 | 2,39 | 1,69 | 20 | 248 | 34 | 57768  | Alpha-amylase 1A                  | AMY1A     |
| P0DTE7     | 34,37 | 2,53E+06 | 6,04E+06 | 4,27E+06 | 2,39 | 1,69 | 20 | 248 | 34 | 57768  | Alpha-amylase 1B                  | AMY1B     |
| P34096     | 29,96 | 3,38E+05 | 5,55E+05 | 8,75E+05 | 1,64 | 2,59 | 31 | 4   | 4  | 16840  | Ribonuclease 4                    | RNase4    |
| P61769     | 27,68 | 3,45E+06 | 7,18E+06 | 5,62E+06 | 2,08 | 1,63 | 49 | 5   | 5  | 13715  | Beta-2-microglobulin              | B2M       |
| Q6UWP8     | 27,66 | 1,47E+06 | 2,80E+06 | 1,81E+06 | 1,91 | 1,23 | 34 | 16  | 16 | 60541  | Suprabasin                        | SBSN      |
| P68871     | 26,73 | 9,91E+05 | 2,23E+06 | 1,48E+06 | 2,25 | 1,49 | 53 | 16  | 7  | 15998  | Hemoglobin subunit beta           | HBB       |
| J3KPA1     | 25,62 | 4,98E+06 | 1,07E+07 | 6,61E+06 | 2,16 | 1,33 | 33 | 15  | 15 | 30975  | Cysteine-rich secretory protein 3 | CRISP3    |
| P23280     | 25,21 | 3,02E+06 | 5,80E+06 | 4,17E+06 | 1,92 | 1,38 | 70 | 38  | 38 | 35367  | Carbonic anhydrase 6              | CA-VI     |
| Q08554     | 24,86 | 8,08E+05 | 1,12E+06 | 1,61E+06 | 1,39 | 2    | 8  | 6   | 6  | 99987  | Desmocollin-1                     | DSC1      |
| A0A087WZY1 | 24,46 | 3,40E+05 | 7,37E+05 | 5,73E+05 | 2,17 | 1,68 | 32 | 16  | 16 | 27911  | Proline-rich proteoglycan 2-like  | aPRP      |

|            |       |          |          |          |       |      |    |    |    |        |                                                 |         |
|------------|-------|----------|----------|----------|-------|------|----|----|----|--------|-------------------------------------------------|---------|
| A0A087WV42 | 24,46 | 3,40E+05 | 7,37E+05 | 5,73E+05 | 2,17  | 1,68 | 45 | 16 | 16 | 19134  | Salivary acidic proline-rich phosphoprotein 1/2 | PRP H1  |
| A0A087WYT0 | 24,46 | 3,40E+05 | 7,37E+05 | 5,73E+05 | 2,17  | 1,68 | 48 | 16 | 16 | 17851  | Salivary acidic proline-rich phosphoprotein 1/2 | PRP H1  |
| P02810     | 24,46 | 3,40E+05 | 7,37E+05 | 5,73E+05 | 2,17  | 1,68 | 51 | 16 | 16 | 17016  | Salivary acidic proline-rich phosphoprotein 1/2 | PRP H1  |
| A0A0A0MT31 | 24,46 | 3,40E+05 | 7,37E+05 | 5,73E+05 | 2,17  | 1,68 | 51 | 16 | 16 | 17015  | Proline-rich protein 4                          | PRP 4   |
| P03973     | 22,84 | 7,91E+06 | 1,55E+07 | 8,93E+06 | 1,96  | 1,13 | 51 | 12 | 12 | 14326  | Antileukoproteinase                             | ALP     |
| P16870     | 22,83 | 1,65E+06 | 3,20E+06 | 2,83E+06 | 1,95  | 1,72 | 15 | 7  | 7  | 53151  | Carboxypeptidase E                              | CPE     |
| P25311     | 22,57 | 5,14E+06 | 1,10E+07 | 8,56E+06 | 2,13  | 1,66 | 70 | 33 | 33 | 34259  | Zinc-alpha-2-glycoprotein                       | ZAG     |
| P61626     | 22,08 | 4,17E+07 | 5,73E+07 | 3,32E+07 | 1,37  | 0,8  | 69 | 30 | 30 | 16537  | Lysozyme C                                      | LYZ     |
| Q08380     | 21,92 | 4,68E+06 | 8,47E+06 | 7,37E+06 | 1,81  | 1,57 | 25 | 16 | 16 | 65331  | Galectin-3-binding protein                      | M2BP    |
| Q00765     | 20,43 | 4,02E+05 | 4,40E+05 | 1,29E+06 | 1,09  | 3,21 | 10 | 2  | 2  | 21493  | Receptor expression-enhancing protein 5         | REEP5   |
| Q86YZ3     | 19,42 | 7,15E+04 | 4,18E+05 | 1,49E+05 | 5,84  | 2,08 | 3  | 8  | 8  | 282389 | Hornerin                                        | HRNR    |
| Q96DA0     | 19,19 | 8,28E+06 | 9,27E+06 | 1,42E+07 | 1,12  | 1,71 | 60 | 40 | 40 | 22739  | Zymogen granule protein 16 homolog B            | ZG16B   |
| P15515     | 18,43 | 1,20E+05 | 1,64E+06 | 8,96E+05 | 13,73 | 7,48 | 28 | 2  | 2  | 6963   | Histatin-1                                      | H1      |
| tG3V1E2    | 18,06 | 1,30E+05 | 2,58E+05 | 1,90E+05 | 1,99  | 1,46 | 13 | 3  | 3  | 27868  | 45 kDa calcium-binding protein                  | SDF4    |
| Q9HCY8     | 17,72 | 1,49E+07 | 8,57E+06 | 1,01E+07 | 0,58  | 0,68 | 81 | 8  | 8  | 11662  | Protein S100-A14                                | S100A14 |

|                   |        |       |          |          |          |      |      |    |    |    |        |                                                        |        |
|-------------------|--------|-------|----------|----------|----------|------|------|----|----|----|--------|--------------------------------------------------------|--------|
|                   | Q9UBD6 | 16,6  | 9,43E+06 | 5,84E+06 | 5,34E+06 | 0,62 | 0,57 | 11 | 4  | 4  | 53179  | Ammonium transporter Rh type C                         | RHCG   |
|                   | F8W787 | 15,86 | 1,05E+06 | 1,94E+06 | 1,75E+06 | 1,84 | 1,65 | 14 | 6  | 6  | 40784  | Cathepsin D                                            | CTSD   |
|                   | P29034 | 15,64 | 1,32E+07 | 7,53E+06 | 8,50E+06 | 0,57 | 0,64 | 28 | 5  | 5  | 11117  | Protein S100-A2                                        | S100A2 |
|                   | Q5VYY1 | 15,06 | 2,58E+05 | 2,23E+05 | 7,58E+05 | 0,86 | 2,94 | 9  | 2  | 2  | 21849  | Ankyrin repeat domain-containing protein 22            | Q5VYY1 |
|                   | P20061 | 14,85 | 1,48E+07 | 2,25E+07 | 1,91E+07 | 1,52 | 1,29 | 27 | 11 | 11 | 48207  | Transcobalamin-1 OS=Homo sapiens                       | TCN1   |
|                   | Q5D862 | 14,67 | 5,30E+05 | 1,03E+06 | 9,35E+05 | 1,95 | 1,76 | 1  | 4  | 4  | 248072 | Filaggrin-2                                            | FLG    |
|                   | Q00325 | 14,08 | 1,64E+06 | 9,64E+05 | 1,30E+06 | 0,59 | 0,79 | 15 | 6  | 6  | 40095  | Phosphate carrier protein mitochondrial                | PHC    |
|                   | I3L397 | 14    | 1,94E+06 | 2,18E+06 | 3,45E+06 | 1,13 | 1,78 | 27 | 6  | 6  | 16019  | Eukaryotic translation initiation factor 5A (Fragment) | EIF5A  |
|                   | P01876 | 13,56 | 7,60E+06 | 6,66E+06 | 5,18E+06 | 0,88 | 0,68 | 32 | 57 | 19 | 37655  | Immunoglobulin heavy constant alpha 1                  | IGHA1  |
|                   | P01871 | 13,2  | 9,34E+06 | 7,61E+06 | 6,15E+06 | 0,82 | 0,66 | 42 | 20 | 20 | 49440  | Immunoglobulin heavy constant mu                       | IGHM   |
|                   | P68871 | 200   | 8,37E+06 | 1,24E+06 | 6,66E+05 | 0,15 | 0,08 | 53 | 16 | 7  | 15998  | Hemoglobin subunit beta                                | HBB    |
| <b>Non-Taster</b> | P69905 | 200   | 2,01E+07 | 2,90E+06 | 1,33E+06 | 0,14 | 0,07 | 46 | 7  | 7  | 15258  | Hemoglobin subunit alpha                               | HBA    |
|                   | P28325 | 93,73 | 1,42E+07 | 4,78E+07 | 4,40E+07 | 3,37 | 3,1  | 73 | 22 | 20 | 16080  | Cystatin-D                                             | Cyst D |

|            |       |          |          |          |      |      |    |    |    |       |                                                 |         |
|------------|-------|----------|----------|----------|------|------|----|----|----|-------|-------------------------------------------------|---------|
| Q96DR5     | 89,32 | 2,31E+07 | 5,43E+07 | 6,47E+07 | 2,35 | 2,8  | 63 | 29 | 28 | 27011 | BPI fold-containing family A member 2           | BPIFA2  |
| P80303     | 47,23 | 2,10E+06 | 5,63E+06 | 4,80E+06 | 2,68 | 2,28 | 34 | 17 | 15 | 50223 | Nucleobindin-2                                  | NEFA    |
| P09228     | 42,99 | 1,19E+06 | 2,44E+06 | 3,10E+06 | 2,06 | 2,62 | 48 | 39 | 14 | 16445 | Cystatin-SA                                     | Cyst SA |
| P01036     | 42,34 | 1,18E+06 | 2,51E+06 | 3,00E+06 | 2,13 | 2,54 | 51 | 59 | 17 | 16214 | Cystatin-S                                      | Cyst S  |
| P01037     | 35,31 | 1,75E+06 | 3,47E+06 | 4,41E+06 | 1,99 | 2,52 | 56 | 61 | 27 | 16388 | Cystatin-SN                                     | Cyst SN |
| P01034     | 31,59 | 4,55E+06 | 9,94E+06 | 9,43E+06 | 2,18 | 2,07 | 64 | 13 | 13 | 15799 | Cystatin-C                                      | Cyst C  |
| Q6UWP8     | 29,87 | 1,23E+06 | 2,53E+06 | 1,97E+06 | 2,06 | 1,6  | 34 | 16 | 16 | 60541 | Suprabasin                                      | SBSN    |
| P80511     | 27,95 | 1,18E+07 | 7,52E+06 | 6,39E+06 | 0,64 | 0,54 | 47 | 5  | 5  | 10575 | Protein S100-A12                                | S100A12 |
| P20160     | 27,22 | 2,23E+07 | 1,37E+07 | 1,08E+07 | 0,61 | 0,48 | 30 | 11 | 11 | 26886 | Azurocidin                                      | AZU1    |
| P22079     | 26,53 | 8,81E+06 | 1,72E+07 | 1,48E+07 | 1,96 | 1,68 | 44 | 33 | 33 | 80288 | Lactoperoxidase                                 | LPO     |
| P08246     | 26,02 | 1,96E+07 | 1,17E+07 | 1,11E+07 | 0,6  | 0,56 | 50 | 17 | 17 | 28518 | Neutrophil elastase                             | HLE     |
| A0A087WZY1 | 22,71 | 3,38E+05 | 6,99E+05 | 5,71E+05 | 2,07 | 1,69 | 32 | 16 | 16 | 27911 | Proline-rich proteoglycan 2-like                | aPRP    |
| A0A087WV42 | 22,71 | 3,38E+05 | 6,99E+05 | 5,71E+05 | 2,07 | 1,69 | 45 | 16 | 16 | 19134 | Salivary acidic proline-rich phosphoprotein 1/2 | PRP H1  |
| A0A087WYT0 | 22,71 | 3,38E+05 | 6,99E+05 | 5,71E+05 | 2,07 | 1,69 | 48 | 16 | 16 | 17851 | Salivary acidic proline-rich phosphoprotein 1/2 | PRP H1  |
| P02810     | 22,71 | 3,38E+05 | 6,99E+05 | 5,71E+05 | 2,07 | 1,69 | 51 | 16 | 16 | 17016 | Salivary acidic proline-rich phosphoprotein 1/2 | aPRPR   |
| A0A0A0MT31 | 22,71 | 3,38E+05 | 6,99E+05 | 5,71E+05 | 2,07 | 1,69 | 51 | 16 | 16 | 17015 | Proline-rich protein 4                          | PRP 4   |

|            |       |          |          |          |      |      |    |    |    |        |                                              |        |
|------------|-------|----------|----------|----------|------|------|----|----|----|--------|----------------------------------------------|--------|
| Q9HDC9     | 21,36 | 2,40E+06 | 1,42E+06 | 1,29E+06 | 0,59 | 0,54 | 14 | 6  | 6  | 46480  | Adipocyte plasma membrane-associated protein | BSCv   |
| Q02818     | 21,34 | 1,87E+05 | 3,32E+05 | 3,85E+05 | 1,77 | 2,05 | 10 | 7  | 5  | 53879  | Nucleobindin-1                               | CALNUC |
| P12273     | 21,24 | 1,23E+07 | 2,13E+07 | 2,08E+07 | 1,72 | 1,69 | 77 | 34 | 34 | 16572  | Prolactin-inducible protein                  | PIP    |
| O95197     | 20,46 | 1,15E+06 | 1,54E+06 | 7,07E+05 | 1,34 | 0,61 | 2  | 3  | 2  | 112611 | Reticulon-3                                  | RTN3   |
| P02763     | 19,84 | 2,16E+06 | 1,43E+06 | 1,21E+06 | 0,66 | 0,56 | 32 | 9  | 6  | 23540  | Alpha-1-acid glycoprotein I                  | AGP 1  |
| Q6E0U4     | 19,63 | 3,60E+05 | 6,23E+05 | 5,53E+05 | 1,73 | 1,54 | 9  | 4  | 4  | 47082  | Dermokine                                    | DMKN   |
| A0A2R8YDF1 | 19,19 | 4,73E+06 | 2,96E+06 | 2,51E+06 | 0,63 | 0,53 | 19 | 11 | 11 | 53369  | Bactericidal permeability-increasing protein | BPI    |
| H7C2Z6     | 18,76 | 7,63E+05 | 4,34E+05 | 3,90E+05 | 0,57 | 0,51 | 31 | 5  | 5  | 16831  | Grancalcin (Fragment)                        | GCA    |
| P49411     | 18,12 | 4,09E+06 | 1,98E+06 | 2,87E+06 | 0,49 | 0,7  | 13 | 7  | 7  | 49542  | Elongation factor Tu mitochondrial           | EF-Tu  |
| P61626     | 17,38 | 2,83E+07 | 4,64E+07 | 4,27E+07 | 1,64 | 1,51 | 69 | 30 | 30 | 16537  | Lysozyme C                                   | LYZ    |
| P03973     | 16,65 | 6,49E+06 | 1,08E+07 | 1,11E+07 | 1,67 | 1,7  | 51 | 12 | 12 | 14326  | Antileukoproteinase                          | ALP    |
| P01024     | 16,41 | 1,53E+07 | 1,10E+07 | 9,81E+06 | 0,72 | 0,64 | 31 | 57 | 56 | 187147 | Complement C3                                | C3     |
| J3KPA1     | 16,37 | 4,91E+06 | 9,00E+06 | 7,38E+06 | 1,83 | 1,5  | 33 | 15 | 15 | 30975  | Cysteine-rich secretory protein 3            | CRISP3 |
| P06702     | 15,44 | 5,09E+07 | 3,29E+07 | 3,29E+07 | 0,65 | 0,65 | 86 | 23 | 23 | 13242  | Protein S100-A9                              | S100A9 |
| P00738     | 15,39 | 7,03E+06 | 5,14E+06 | 4,46E+06 | 0,73 | 0,63 | 43 | 17 | 17 | 45205  | Haptoglobin                                  | HP     |
| A0A494C0X7 | 15,27 | 1,75E+06 | 1,19E+06 | 1,02E+06 | 0,68 | 0,58 | 14 | 11 | 11 | 84791  | Integrin beta                                | ITGB2  |
| P15515     | 15,04 | 9,91E+04 | 7,03E+05 | 5,80E+05 | 7,09 | 5,85 | 28 | 2  | 2  | 6963   | Histatin-1                                   | H1     |

|        |       |          |          |          |      |      |    |    |    |        |                                      |            |
|--------|-------|----------|----------|----------|------|------|----|----|----|--------|--------------------------------------|------------|
| P13796 | 14,93 | 1,51E+07 | 1,27E+07 | 9,38E+06 | 0,84 | 0,62 | 42 | 32 | 24 | 70289  | Plastin-2                            | LCP1       |
| A8K2U0 | 14,88 | 1,68E+07 | 1,08E+07 | 1,18E+07 | 0,64 | 0,7  | 34 | 49 | 48 | 161106 | Alpha-2-macroglobulin-like protein 1 | A2ML1      |
| P08311 | 14,57 | 1,59E+07 | 1,08E+07 | 1,03E+07 | 0,68 | 0,65 | 57 | 20 | 20 | 28837  | Cathepsin G                          | CG         |
| P16870 | 14,26 | 1,67E+06 | 2,73E+06 | 2,24E+06 | 1,63 | 1,34 | 15 | 7  | 7  | 53151  | Carboxypeptidase E                   | CPE        |
| P01023 | 14,16 | 1,26E+07 | 9,67E+06 | 8,52E+06 | 0,77 | 0,68 | 26 | 37 | 37 | 163290 | Alpha-2-macroglobulin                | Alpha-2-M  |
| Q96P63 | 13,25 | 2,52E+05 | 3,27E+05 | 4,39E+05 | 1,3  | 1,74 | 9  | 4  | 4  | 46276  | Serpin B12                           | Serpin B12 |

Significance: Only protein groups with a significance above this threshold are listed. The significance score is calculated as the  $-10\log_{10}$  of the significance testing p-value. PEAKS provides ANOVA significance testing methods . A significance score threshold of 13 equals to a significance testing p value of 0.05.
